# Supplementary material for: Acute Kidney Injury in Critically-Ill COVID-19 Patients
Source: MDPI journal article supplement (doi:10.3390/jcm11072029), 2022-04-05
Supplement: s1 [file s1]

**Table S1. Urinary protein profile of critically-ill COVID-19 patients, with or without acute kidney injury (AKI, defined taking into account available urine output data), median [IQR]**

|                                                               | Total           | No AKI           | AKI              | p             |
|---------------------------------------------------------------|-----------------|------------------|------------------|---------------|
| Day 1                                                         | N=58            | N=20             | N=38             |               |
| Proteinuria (mg/mmol)                                         | 95.5 [60-131.5] | 66.7 [40-107.5]  | 110 [66.75-170]  | <b>0.013</b>  |
| Albuminuria(mg/mmol)<br>(normal value < 3)                    | 20.9 [10-49]    | 15.1 [9.8-36.6]  | 32.1 [10.2-52.1] | 0.14          |
| Transferrin (mg/mmol)<br>(normal value < 0.2)                 | 1.1 [0.2-2.2]   | 1.1 [0.4-2.1]    | 1.1 [0.1-2.3]    | 0.85          |
| Immunoglobulin G (mg/mmol)<br>(normal value < 1.13)           | 2.8 [1.1-5.9]   | 1.8 [0.88-4.8]   | 3.7 [1.2-6.7]    | 0.10          |
| Glomerular proteinuria<br>(mg/mmol)                           | 23.2 [12.4-46]  | 21.7 [11.4-32.6] | 32.3 [15-49.6]   | 0.20          |
| Alpha 1 microglobulin<br>(mg/mmol)<br>(normal value < 2.23)   | 12 [6.4-24.6]   | 9.8 [5-12.1]     | 17.1 [8.9-62.3]  | <b>0.006</b>  |
| Retinol binding protein<br>(mg/mmol)<br>(normal value < 0.08) | 1.7 [0.3-4.6]   | 0.34 [0.08-3.5]  | 3.4 [1.2-13]     | <b>0.0005</b> |
| Tubular protein (mg/mmol)                                     | 14 [7.1-31]     | 10.4 [5-13.9]    | 22.9 [10.6-50.3] | <b>0.002</b>  |
| Albumin / protein ratio (%)                                   | 28.9 [13-36]    | 26.9 [13.535.5]  | 28.9 [11.5-39.4] | 0.72          |

**Table S2. Factors associated with acute kidney injury (AKI, defined taking into account available urine output data), and with death at 28 days in critically-ill COVID-19 patients**

| Variable                                                      | Absolute standardised difference (%) | Univariable logistic regression | Multivariable logistic regression | Multivariable Cox regression with time-dependent covariates |
|---------------------------------------------------------------|--------------------------------------|---------------------------------|-----------------------------------|-------------------------------------------------------------|
| <b>ACUTE KIDNEY INJURY</b>                                    |                                      |                                 |                                   |                                                             |
| Hypertension                                                  | 50.4                                 | 2.72 [0.99-7.44], p=0.05        | I/NR                              | I/NR                                                        |
| Pre-ICU eGFR, mL/min/1.73m <sup>2</sup>                       | 48.1                                 | 0.98 [0.96-1.00], p=0.06        | I/NR                              | I/NR                                                        |
| SAPSII                                                        | 74                                   | 1.08 [1.02-1.15], p<0.01        | I/NR                              | 1.03 [1.01- 1.06], p=0.008                                  |
| Need for vasopressor at ICU admission                         | 84.1                                 | 5.47 [1.74-17.2], p<0.01        | 5.47 [1.74-17.2], p<0.01          | 2.67 [1.38-5.18], p=0.003                                   |
| <b>28-DAY MORTALITY</b>                                       |                                      |                                 |                                   |                                                             |
| <b>Cardiovascular comorbidities</b>                           |                                      |                                 |                                   |                                                             |
| Hypertension                                                  | 78.8                                 | 4.94 [1.57-15.52], p=0.006      | NI                                | NI                                                          |
| Diabetes mellitus                                             | 74.6                                 | 4.46 [1.55-12.82], p=0.006      | NI                                | NI                                                          |
| Congestive heart failure                                      | 79.9                                 | 18.53 [2.12-162], p=0.008       | I/NS                              | 3.61 [1.17-11.13], p=0.03                                   |
| ACE inhibitor                                                 | 72.7                                 | 6.3 [1.69-23.5], p=0.006        | I/NS                              | I/NS                                                        |
| Diuretic                                                      | 56.1                                 | 4.1 [1.16-14.42], p=0.028       | NI                                | NI                                                          |
| <b>Severity score at ICU admission</b>                        |                                      |                                 |                                   |                                                             |
| SAPSII                                                        | 111.5                                | 1.131 [1.06-1.21], p<0.01       | NI                                | NI                                                          |
| Age, years                                                    | 83.1                                 | 1.076 [1.02-1.13], p=0.04       | NI                                | NI                                                          |
| Non-renal SOFA score                                          | 125.5                                | 1.85 [1.36-2.52], p<0.01        | 1.91 [1.29-3.11], p<0.01          | 1.71 [1.34-2.19], p<0.001                                   |
| Fluid balance at day 1                                        | 57.9                                 | 1.001 [1-1.001] p=0.03          | NI                                | NI                                                          |
| <b>Hemodynamic support</b>                                    |                                      |                                 |                                   |                                                             |
| Need for inotrope at ICU admission                            | 51.2                                 | 9 [0.95-85.7], p=0.056          | NI                                | NI                                                          |
| Need for inotrope during ICU stay                             | 62.1                                 | 5.9 [1.37-25.53], p=0.018       | NI                                | NI                                                          |
| Need for vasopressor at ICU admission                         | 88.3                                 | 5.55 [1.89-16.37], p=0.002      | NI                                | NI                                                          |
| Need for vasopressor during ICU stay                          | 93.7                                 | 7.64 [2-29.2], p=0.03           | I/NR                              | I/NR                                                        |
| <b>Respiratory support</b>                                    |                                      |                                 |                                   |                                                             |
| Invasive mechanical ventilation at ICU admission              | 63.8                                 | 4.5 [1.17-17.3], p=0.003        | NI                                | NI                                                          |
| <b>Kidney function</b>                                        |                                      |                                 |                                   |                                                             |
| Pre-ICU eGFR, mL/min/1.73m <sup>2</sup>                       | 59.4                                 | 0.98 [0.95-0.99], p=0.023       | NI                                | NI                                                          |
| Acute kidney injury                                           | 126.1                                | 25.1 [3.12-201.6], p=0.002      | NI                                | NI                                                          |
| Acute kidney injury with KDIGO 3 stage                        | 86.9                                 | 12.57 [1.41-111.7], p=0.023     | NI                                | NI                                                          |
| Acute kidney injury with need for renal replacement therapy * | 156.7                                | 18 [4.99-64.9], p<0.001         | 24.2 [5.04-177.48], p<0.001       | 1.58 [1.06-2.37], p= 0.03                                   |

[26] Selection of variables entered into the model was based on maximal imbalances between groups; NI, not included in the model; I/NR, included, but not retained in the final model; I/NS, included, but not significant in the final model.\* Time-dependent covariate.

**Table S3. Univariable and multivariable analysis of factors associated with acute kidney injury (AKI, defined taking into account available urine output data)**

| Variable                                | Univariable analysis<br>HR [95%IC] | Multivariable analysis*<br>HR [95%IC] |
|-----------------------------------------|------------------------------------|---------------------------------------|
| ACUTE KIDNEY INJURY                     |                                    |                                       |
| Hypertension                            | 2.04 [1.14-3.66], p=0.016          | 1.7 [0.84-3.4], p=0.1                 |
| Pre-ICU eGFR, mL/min/1.73m <sup>2</sup> | 0.985 [0.972-0.999], p=0.032       | 1 [0.98-1], p=0.9                     |
| SAPSII                                  | 1.05 [1.03-1.07], p<0.00001        | <b>1.07 [1.02-1.1], p=0.0009</b>      |
| Need for vasopressor at ICU admission   | 3.65 [2.01-6.62], p=0.0002         | <b>2.5 [1.32-4.6], p=0.005</b>        |

\*Fine and Gray model with death as a competing risk

**Table S4. Univariable and multivariable analysis of factors associated with 28 days mortality (AKI, defined taking into account available urine output data)**

| Variable                                                      | Univariable analysis<br>HR [95%IC] | Multivariable analysis*<br>HR [95%IC] |
|---------------------------------------------------------------|------------------------------------|---------------------------------------|
| 28-DAY MORTALITY                                              |                                    |                                       |
| Cardiovascular comorbidities                                  |                                    |                                       |
| Hypertension                                                  | 3.96 [1.47-10.6], p=0.006          | NI                                    |
| Diabetesmellitus                                              | 3.36 [1.49-7.58], p=0.003          | NI                                    |
| Congestive heartfailure                                       | 7.81 [3.08-19.8], p=<0.0001        | 5.43 [1.17-11.13], p=0.002            |
| Diuretic                                                      | 3.31 [1.41-7.78], p=0.006          | NI                                    |
| Severity score at ICU admission                               |                                    |                                       |
| SAPSII                                                        | 1.08 [1.05-1.11]? P<0.0001         | NI                                    |
| Age, years                                                    | 1.06 [1.02-1.1], p=0.004           | NI                                    |
| Non-renal SOFA score                                          | 1.63 [1.34-2], p<0.0001            | 1.74 [1.34-2.19], p<0.001             |
| Hemodynamic support                                           |                                    |                                       |
| Need for inotrope during ICU stay                             | 3.82 [1.57-9.27], p=0.003          | NI                                    |
| Need for vasopressor at ICU admission                         | 4.42 [1.83-10.7], p=0.0009         | NI                                    |
| Respiratory support                                           |                                    |                                       |
| Invasive mechanical ventilation at ICU admission              | 3.79 [1.13612.7], p=0.03           | NI                                    |
| Kidneyfunction                                                |                                    |                                       |
| Pre-ICU eGFR, mL/min/1.73m <sup>2</sup>                       | 0.98 [0.97-0.99], p=0.006          | NI                                    |
| Acute kidney injury with need for renal replacement therapy * | 9.32 [3.08-19.8], p<0.001          | 1.69 [1.06-2.37], p= 0.0006           |

\*Cox regression with time-dependent covariates
